# Supplementary material for: Transfer of vertically aligned carbon nanotube arrays onto flexible substrates for gecko-inspired dry adhesive application
Source: Royal Society of Chemistry journal article supplement (doi:10.1039/c5ra06206c), 2015-01-01
Supplement: c5ra06206c1.pdf [file c5ra06206c1.pdf]

Electronic supplementary information of

**Transfer of vertically aligned carbon nanotube arrays onto flexible  
substrates for gecko-inspired dry adhesive application**

Yang Li,<sup>a,b</sup> Hao Zhang,<sup>b</sup> Yagang Yao,<sup>\*c</sup> Taotao Li,<sup>c</sup> Yongyi Zhang,<sup>c</sup> Qingwen Li,<sup>c</sup> and  
Zhendong Dai,<sup>\*b</sup>

<sup>a</sup> *College of Material Science and Technology, Nanjing University of Aeronautics  
and Astronautics, Nanjing 210016, China.*

<sup>b</sup> *Institute of Bio-inspired Structure and Surface Engineering, College of  
Astronautics, Nanjing University of Aeronautics and Astronautics, Nanjing 210016,  
China.*

<sup>c</sup> *Key Laboratory of Nanodevices and Applications, Suzhou Institute of Nano-tech  
and Nano-bionics, Chinese Academy of Sciences, University of Chinese Academy of  
Sciences, Suzhou 215123, China.*

---

<sup>\*c</sup> Corresponding author. Tel: +86-512-62872829; Fax: +86-512-62872552; E-mail:  
ygyao2013@sinano.ac.cn (Y. Yao).

<sup>\*b</sup> Corresponding author. Tel: +86-025-84892584; Fax: +86-025-84892581; E-mail:  
zddai@nuaa.edu.cn (Z. Dai).

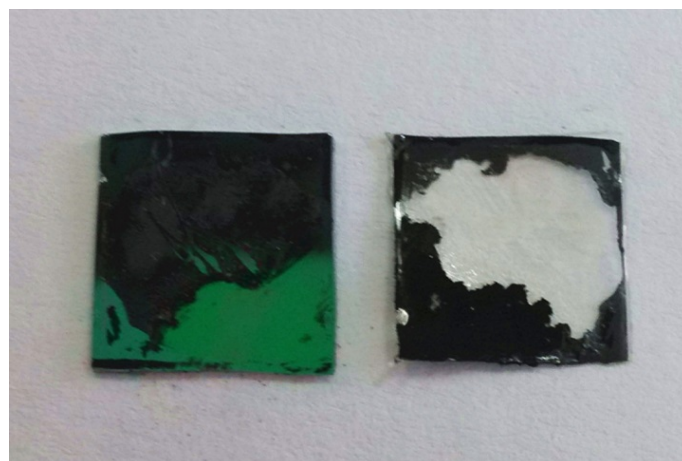

**Fig. S1** Photographs of VACNT arrays transferred onto PET substrate with CNTs residues left on silicon substrate.

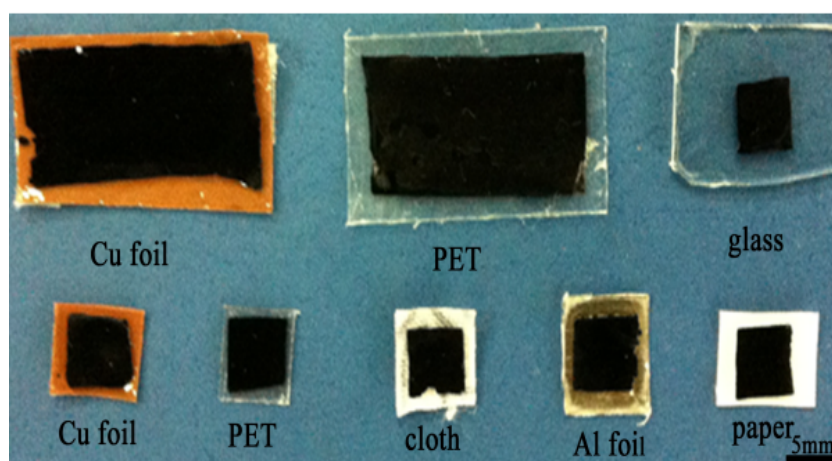

**Fig. S2** Photographs of VACNT arrays transferred onto various substrates.

|                   |     |     |     |     |
|-------------------|-----|-----|-----|-----|
| PET               |     |     |     |     |
| Cu                |     |     |     |     |
| Al                |     |     |     |     |
| TPU concentration | 10% | 15% | 20% | 25% |

**Fig. S3** Photographs of the bottom transferred VACNT arrays onto different substrates under different TPU concentration (a) PET, (b) Copper foil, (c) Aluminum.

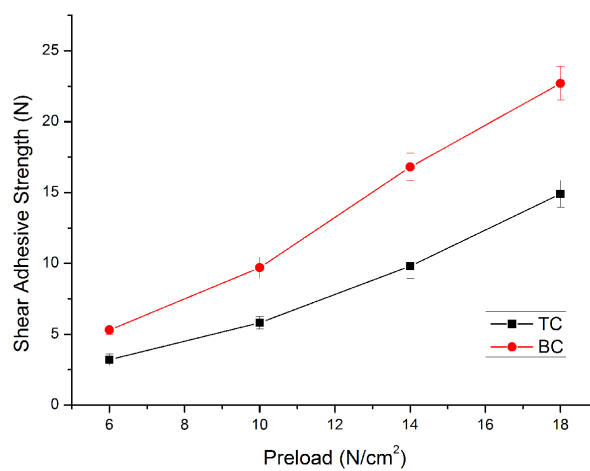

**Fig. S4** The effect of preload on the shear adhesive strength of BC and TC samples. The errors represent standard errors calculated from 5 measurements.
